# Supplementary material
Source: PubMed Central journal article supplement (PMC2782662)
Supplement: NIHMS145317-supplement-1_si_001.pdf [file NIHMS145317-supplement-1_si_001.pdf]

**Supplementary material for Low Temperature  $^{65}\text{Cu}$  NMR Spectroscopy of the  $\text{Cu}^+$  Site in Azurin, by Andrew S. Lipton, Robert W. Heck, Wibe A. de Jong, Amy R. Gao, Xiongjian Wu, Adrienne Roehrich, Gerard S. Harbison and Paul D. Ellis**

**Reference 43 complete citation**

Frisch, M. J.; Trucks, G. W.; Schlegel, H. B.; Scuseria, G. E.; Robb, M. A.; Cheeseman, J. R.; Montgomery, Jr., J. A.; Vreven, T.; Kudin, K. N.; Burant, J. C.; Millam, J. M.; Iyengar, S. S.; Tomasi, J.; Barone, V.; Mennucci, B.; Cossi, M.; Scalmani, G.; Rega, N.; Petersson, G. A.; Nakatsuji, H.; Hada, M.; Ehara, M.; Toyota, K.; Fukuda, R.; Hasegawa, J.; Ishida, M.; Nakajima, T.; Honda, Y.; Kitao, O.; Nakai, H.; Klene, M.; Li, X.; Knox, J. E.; Hratchian, H. P.; Cross, J. B.; Bakken, V.; Adamo, C.; Jaramillo, J.; Gomperts, R.; Stratmann, R. E.; Yazyev, O.; Austin, A. J.; Cammi, R.; Pomelli, C.; Ochterski, J. W.; Ayala, P. Y.; Morokuma, K.; Voth, G. A.; Salvador, P.; Dannenberg, J. J.; Zakrzewski, V. G.; Dapprich, S.; Daniels, A. D.; Strain, M. C.; Farkas, O.; Malick, D. K.; Rabuck, A. D.; Raghavachari, K.; Foresman, J. B.; Ortiz, J. V.; Cui, Q.; Baboul, A. G.; Clifford, S.; Cioslowski, J.; Stefanov, B. B.; Liu, G.; Liashenko, A.; Piskorz, P.; Komaromi, I.; Martin, R. L.; Fox, D. J.; Keith, T.; Al-Laham, M. A.; Peng, C. Y.; Nanayakkara, A.; Challacombe, M.; Gill, P. M. W.; Johnson, B.; Chen, W.; Wong, M. W.; Gonzalez, C.; and Pople, J. A.; Gaussian, Inc., Wallingford CT, 2004.

**Reference 45 complete citation**

Bylaska, E. J.; Jong, W. A. d.; Kowalski, K.; Straatsma, T. P.; Valiev, M.; Wang, D.; Aprà, E.; Windus, T. L.; Hirata, S.; Hackler, M. T.; Zhao, Y.; Fan, P.-D.; Harrison, R. J.; Dupuis, M.; Smith, D. M. A.; Nieplocha, J.; Tipparaju, V.; Krishnan, M.; Auer, A. A.; Nooijen, M.; Brown, E.; Cisneros, G.; Fann, G. I.; Früchtl, H.; Garza, J.; Hirao, K.; Kendall, R.; Nichols, J. A.; Tsemekhman, K.; Wolinski, K.; Anchell, J.; Bernholdt, D.; Borowski, P.; Clark, T.; Clerc, D.; Dachsel, H.; Deegan, M.; Dyll, K.; Elwood, D.; Glendening, E.; Gutowski, M.; Hess, A.; Jaffe, J.; Johnson, B.; Ju, J.; Kobayashi, R.; Kutteh, R.; Lin, Z.; Littlefield, R.; Long, X.; Meng, B.; Nakajima, T.; Niu, S.; Pollack, L.; Rosing, M.; Sandrone, G.; Stave, M.; Taylor, H.; Thomas, G.; Lenthe, J. v.; Wong, A.; Zhang, Z.; NWChem v5.0 ed. Richland, WA 99352, USA, 2006.

**Table 5:** optimized coordinates of bis(imidazole) copper(I)methylsulfide

|    |      |               |               |               |
|----|------|---------------|---------------|---------------|
| Cu | 29.0 | -0.1689029072 | -0.5489970740 | 0.0000000000  |
| H  | 1.0  | -2.4915940951 | -0.3844348329 | -4.4682044451 |
| H  | 1.0  | -2.4915940951 | -0.3844348329 | 4.4682044451  |
| S  | 16.0 | 2.1258474413  | -0.3813476530 | 0.0000000000  |
| C  | 6.0  | 2.1464422778  | 1.4662955721  | 0.0000000000  |
| H  | 1.0  | 3.1870522527  | 1.8270963879  | 0.0000000000  |
| H  | 1.0  | 1.6436886554  | 1.8772710890  | -0.8927627025 |
| H  | 1.0  | 1.6436886554  | 1.8772710890  | 0.8927627025  |
| N  | 7.0  | -0.7045513895 | -0.5077213523 | -1.8287079781 |
| N  | 7.0  | -0.7045513895 | -0.5077213523 | 1.8287079781  |
| C  | 6.0  | -1.9008252771 | -0.5035030861 | -2.4342152615 |
| C  | 6.0  | -1.9008252771 | -0.5035030861 | 2.4342152615  |
| C  | 6.0  | 0.2479689360  | -0.4043287280 | -2.8323071646 |
| C  | 6.0  | 0.2479689360  | -0.4043287280 | 2.8323071646  |
| N  | 7.0  | -1.7417059886 | -0.4043872393 | -3.7866021700 |
| N  | 7.0  | -1.7417059886 | -0.4043872393 | 3.7866021700  |
| C  | 6.0  | -0.3885846422 | -0.3408547007 | -4.0625534917 |
| C  | 6.0  | -0.3885846422 | -0.3408547007 | 4.0625534917  |
| H  | 1.0  | -0.0074032073 | -0.2581965349 | -5.0756380723 |
| H  | 1.0  | -0.0074032073 | -0.2581965349 | 5.0756380723  |
| H  | 1.0  | 1.3050156411  | -0.3957464050 | -2.5659833648 |
| H  | 1.0  | 1.3050156411  | -0.3957464050 | 2.5659833648  |
| H  | 1.0  | -2.8672281644 | -0.5696218264 | -1.9452355108 |
| H  | 1.0  | -2.8672281644 | -0.5696218264 | 1.9452355108  |

**Table 6:** optimized coordinates of the quantum region of azurin, in pdb notation.

|      |    |   |        |        |         |       |
|------|----|---|--------|--------|---------|-------|
| ATOM | 1  | C | 3.007  | -6.959 | -10.675 | 6.00  |
| ATOM | 2  | O | 2.722  | -5.790 | -10.927 | 8.00  |
| ATOM | 3  | N | 3.418  | -7.815 | -11.647 | 7.00  |
| ATOM | 4  | H | 3.627  | -8.809 | -11.432 | 1.00  |
| ATOM | 5  | C | 3.488  | -7.353 | -12.996 | 6.00  |
| ATOM | 6  | H | 3.889  | -6.326 | -13.036 | 1.00  |
| ATOM | 7  | C | 6.392  | -0.911 | -11.588 | 6.00  |
| ATOM | 8  | O | 6.385  | -1.776 | -10.714 | 8.00  |
| ATOM | 9  | N | 6.729  | 0.366  | -11.324 | 7.00  |
| ATOM | 10 | H | 6.636  | 1.106  | -12.036 | 1.00  |
| ATOM | 11 | C | 6.967  | 0.716  | -9.963  | 6.00  |
| ATOM | 12 | H | 7.362  | 1.753  | -9.921  | 1.00  |
| ATOM | 13 | H | 7.710  | 0.020  | -9.517  | 1.00  |
| ATOM | 14 | C | 5.678  | 0.645  | -9.169  | 6.00  |
| ATOM | 15 | O | 4.629  | 1.090  | -9.644  | 8.00  |
| ATOM | 16 | N | 5.801  | 0.117  | -7.945  | 7.00  |
| ATOM | 17 | H | 6.703  | -0.302 | -7.644  | 1.00  |
| ATOM | 18 | C | 4.704  | 0.122  | -7.034  | 6.00  |
| ATOM | 19 | H | 3.890  | 0.750  | -7.482  | 1.00  |
| ATOM | 20 | C | 4.114  | -1.262 | -6.769  | 6.00  |
| ATOM | 21 | H | 3.261  | -1.103 | -6.064  | 1.00  |
| ATOM | 22 | H | 4.863  | -1.890 | -6.237  | 1.00  |
| ATOM | 23 | C | 3.640  | -1.950 | -7.993  | 6.00  |
| ATOM | 24 | N | 2.848  | -1.322 | -8.925  | 7.00  |
| ATOM | 25 | C | 2.562  | -2.232 | -9.847  | 6.00  |
| ATOM | 26 | H | 1.940  | -2.049 | -10.735 | 1.00  |
| ATOM | 27 | N | 3.125  | -3.419 | -9.550  | 7.00  |
| ATOM | 28 | H | 2.999  | -4.316 | -10.084 | 1.00  |
| ATOM | 29 | C | 3.822  | -3.261 | -8.383  | 6.00  |
| ATOM | 30 | H | 4.413  | -4.071 | -7.932  | 1.00  |
| ATOM | 31 | C | 5.147  | 0.687  | -5.712  | 6.00  |
| ATOM | 32 | O | 6.198  | 0.311  | -5.188  | 8.00  |
| ATOM | 33 | N | 4.287  | 1.545  | -5.145  | 7.00  |
| ATOM | 34 | H | 3.446  | 1.881  | -5.691  | 1.00  |
| ATOM | 35 | C | 4.459  | 1.904  | -3.783  | 6.00  |
| ATOM | 36 | H | 5.275  | 1.269  | -3.371  | 1.00  |
| ATOM | 37 | C | 0.355  | 1.740  | -6.479  | 6.00  |
| ATOM | 38 | H | -0.477 | 1.473  | -7.169  | 1.00  |
| ATOM | 39 | H | 0.550  | 0.881  | -5.803  | 1.00  |
| ATOM | 40 | S | 1.865  | 2.131  | -7.434  | 16.00 |
| ATOM | 41 | C | 1.592  | 6.304  | -8.524  | 6.00  |
| ATOM | 42 | O | 1.796  | 7.324  | -9.180  | 8.00  |
| ATOM | 43 | N | 2.025  | 5.091  | -8.945  | 7.00  |
| ATOM | 44 | H | 1.839  | 4.196  | -8.398  | 1.00  |

|      |    |     |        |        |         |       |
|------|----|-----|--------|--------|---------|-------|
| ATOM | 45 | C   | 2.726  | 5.024  | -10.172 | 6.00  |
| ATOM | 46 | H   | 3.475  | 5.842  | -10.201 | 1.00  |
| ATOM | 47 | C   | 3.337  | 3.653  | -10.366 | 6.00  |
| ATOM | 48 | H   | 2.554  | 2.862  | -10.267 | 1.00  |
| ATOM | 49 | H   | 3.997  | 3.477  | -9.488  | 1.00  |
| ATOM | 50 | C   | 4.122  | 3.459  | -11.623 | 6.00  |
| ATOM | 51 | C   | 3.475  | 3.238  | -12.847 | 6.00  |
| ATOM | 52 | H   | 2.371  | 3.165  | -12.868 | 1.00  |
| ATOM | 53 | C   | 4.200  | 3.134  | -14.032 | 6.00  |
| ATOM | 54 | H   | 3.660  | 3.045  | -14.995 | 1.00  |
| ATOM | 55 | C   | 5.592  | 3.208  | -14.021 | 6.00  |
| ATOM | 56 | H   | 6.161  | 3.145  | -14.965 | 1.00  |
| ATOM | 57 | C   | 6.254  | 3.397  | -12.805 | 6.00  |
| ATOM | 58 | H   | 7.353  | 3.479  | -12.779 | 1.00  |
| ATOM | 59 | C   | 5.521  | 3.527  | -11.624 | 6.00  |
| ATOM | 60 | H   | 6.042  | 3.696  | -10.665 | 1.00  |
| ATOM | 61 | C   | -0.590 | 1.846  | -10.605 | 6.00  |
| ATOM | 62 | H   | -0.785 | 1.077  | -9.816  | 1.00  |
| ATOM | 63 | H   | -0.285 | 2.758  | -10.044 | 1.00  |
| ATOM | 64 | C   | 0.534  | 1.333  | -11.437 | 6.00  |
| ATOM | 65 | N   | 1.662  | 0.822  | -10.841 | 7.00  |
| ATOM | 66 | C   | 2.480  | 0.438  | -11.811 | 6.00  |
| ATOM | 67 | H   | 3.501  | 0.060  | -11.638 | 1.00  |
| ATOM | 68 | N   | 1.921  | 0.649  | -13.017 | 7.00  |
| ATOM | 69 | H   | 2.380  | 0.505  | -13.955 | 1.00  |
| ATOM | 70 | C   | 0.701  | 1.232  | -12.809 | 6.00  |
| ATOM | 71 | H   | 0.048  | 1.533  | -13.640 | 1.00  |
| ATOM | 72 | C   | -2.609 | -0.343 | -7.728  | 6.00  |
| ATOM | 73 | H   | -2.016 | -0.346 | -6.786  | 1.00  |
| ATOM | 74 | H   | -2.558 | 0.696  | -8.117  | 1.00  |
| ATOM | 75 | C   | -2.011 | -1.327 | -8.705  | 6.00  |
| ATOM | 76 | H   | -2.403 | -1.197 | -9.736  | 1.00  |
| ATOM | 77 | H   | -2.231 | -2.383 | -8.425  | 1.00  |
| ATOM | 78 | S   | -0.209 | -1.182 | -8.841  | 16.00 |
| ATOM | 79 | C   | 0.209  | -1.830 | -7.217  | 6.00  |
| ATOM | 80 | H   | 1.307  | -1.991 | -7.202  | 1.00  |
| ATOM | 81 | H   | -0.314 | -2.796 | -7.034  | 1.00  |
| ATOM | 82 | H   | -0.048 | -1.115 | -6.406  | 1.00  |
| ATOM | 83 | Cu  | 2.110  | 0.510  | -8.934  | 29.00 |
| ATOM | 84 | H   | 3.903  | 0.145  | -15.548 | 1.00  |
| ATOM | 85 | O   | 2.968  | 0.472  | -15.521 | 8.00  |
| ATOM | 86 | H   | 3.061  | 1.430  | -15.704 | 1.00  |
| ATOM | 87 | H_L | 2.948  | -7.361 | -9.645  | 1.00  |
| ATOM | 88 | H_L | 4.078  | -8.015 | -13.634 | 1.00  |
| ATOM | 89 | H_L | 2.409  | -7.295 | -13.476 | 1.00  |
| ATOM | 90 | H_L | 6.152  | -1.131 | -12.634 | 1.00  |

|      |    |     |        |        |         |      |
|------|----|-----|--------|--------|---------|------|
| ATOM | 91 | H_L | 4.709  | 2.925  | -3.637  | 1.00 |
| ATOM | 92 | H_L | 3.468  | 1.611  | -3.200  | 1.00 |
| ATOM | 93 | H_L | 0.046  | 2.593  | -5.850  | 1.00 |
| ATOM | 94 | H_L | 1.030  | 6.344  | -7.587  | 1.00 |
| ATOM | 95 | H_L | 1.963  | 5.265  | -11.068 | 1.00 |
| ATOM | 96 | H_L | -1.496 | 2.043  | -11.173 | 1.00 |
| ATOM | 97 | H_L | -3.646 | -0.593 | -7.492  | 1.00 |
